# Supplementary material for: Dovitinib enhances temozolomide efficacy in glioblastoma cells
Source: PubMed Central journal article supplement (PMC5537714; doi:10.1002/1878-0261.12076), 2017-06-05

# Suppl. Fig. 2

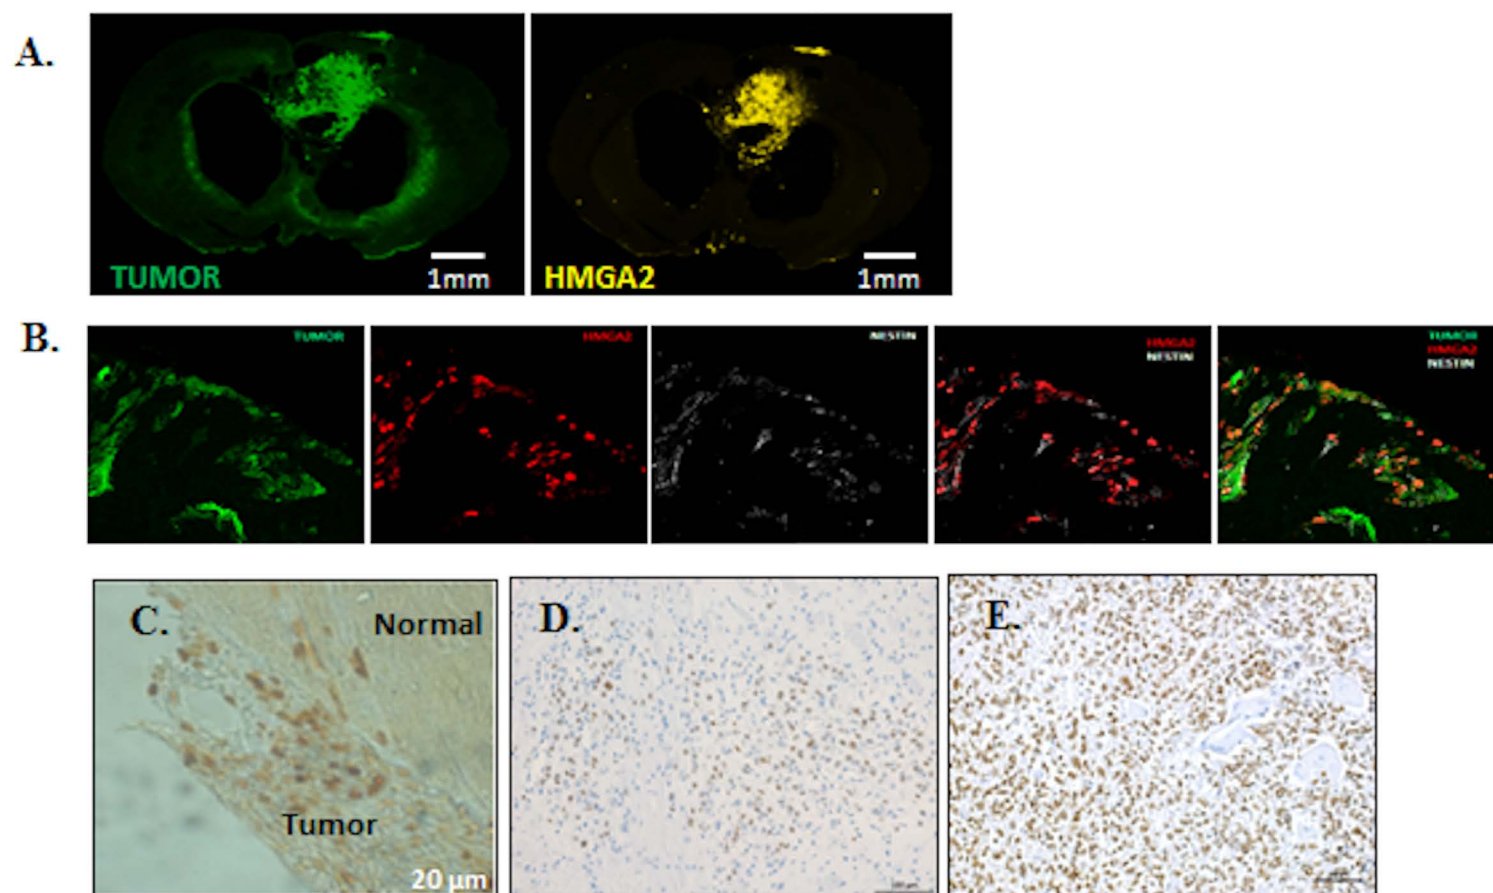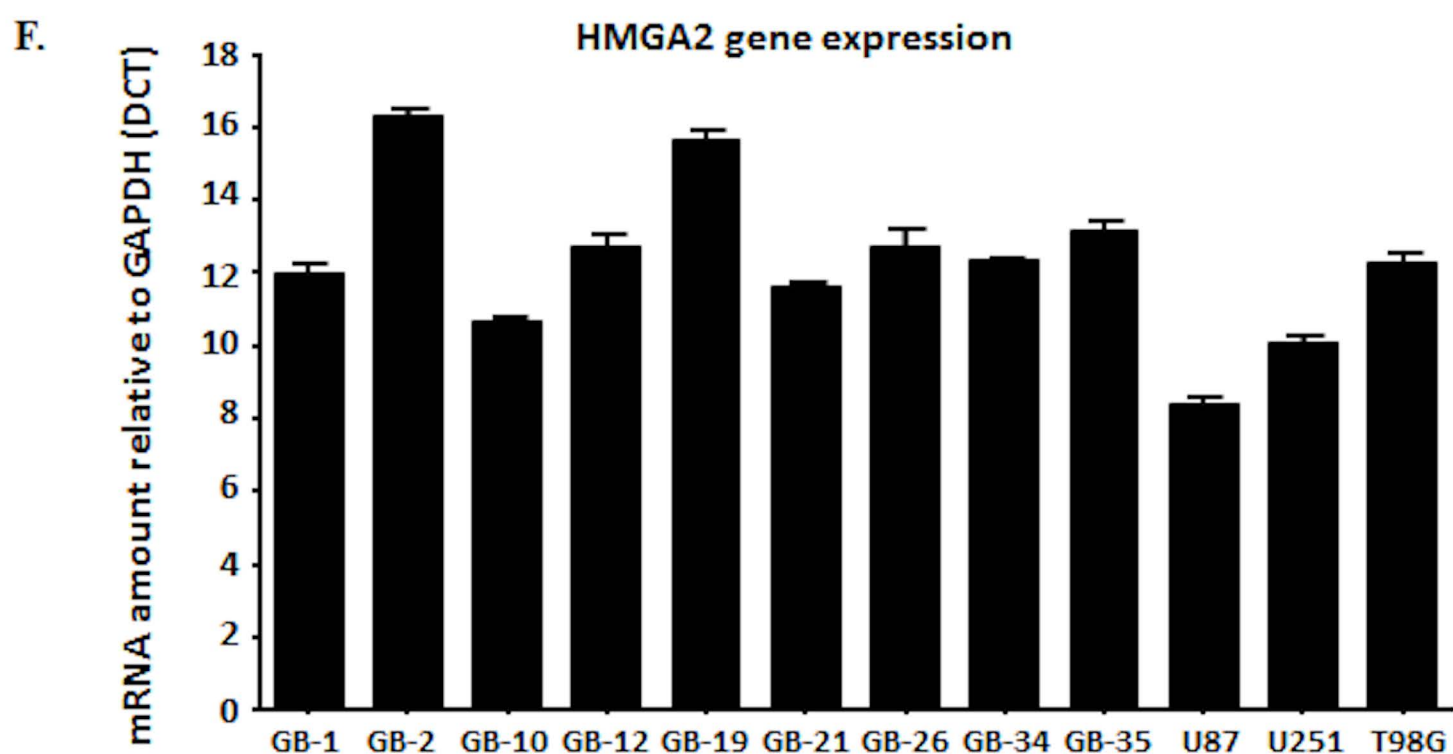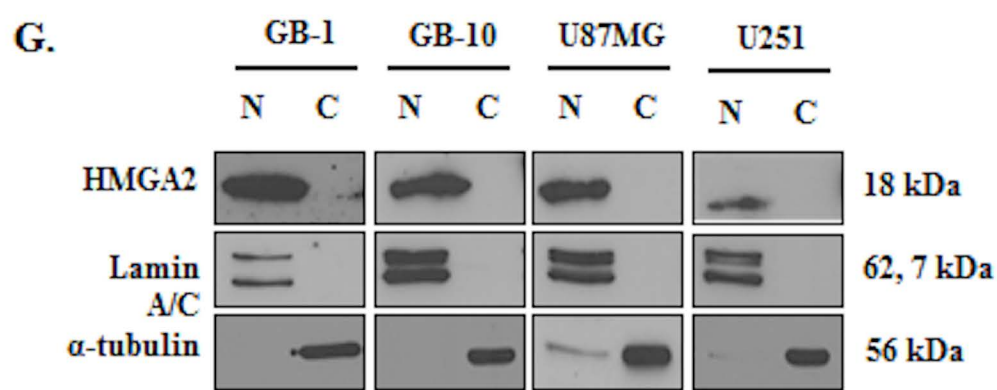

Supplement: MOL2-11-1078-s002.pdf [file MOL2-11-1078-s002.pdf]
