# Supplementary material for: Dovitinib enhances temozolomide efficacy in glioblastoma cells
Source: PubMed Central journal article supplement (PMC5537714; doi:10.1002/1878-0261.12076), 2017-06-05

### Suppl. Fig. 3

A.

U251 Parental

Dov 5 $\mu$ M  
(72h)

-      +

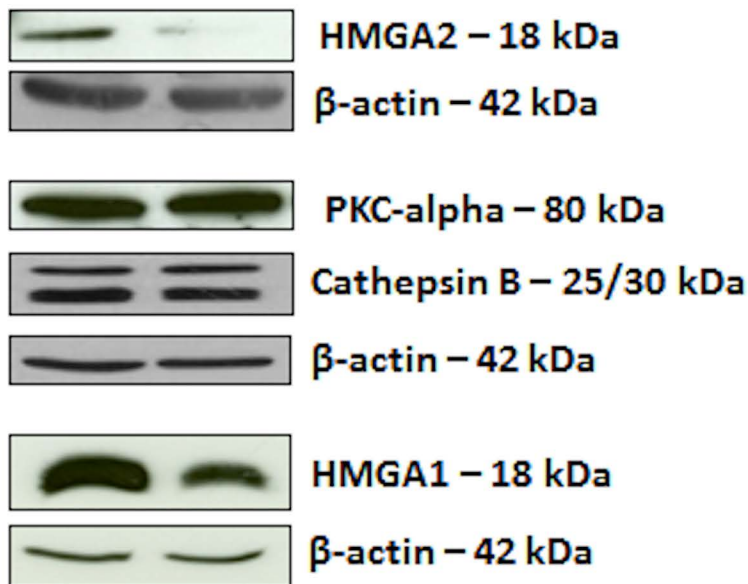

B.

U251- HMGA2 clone2

Dov 5 $\mu$ M  
(72h)

-      +

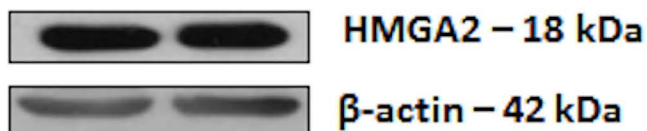

Supplement: MOL2-11-1078-s003.pdf [file MOL2-11-1078-s003.pdf]
