# Supplementary material for: Dovitinib enhances temozolomide efficacy in glioblastoma cells
Source: PubMed Central journal article supplement (PMC5537714; doi:10.1002/1878-0261.12076), 2017-06-05
Supplement: MOL2-11-1078-s006.pdf [file MOL2-11-1078-s006.pdf]

## Suppl. Fig.6

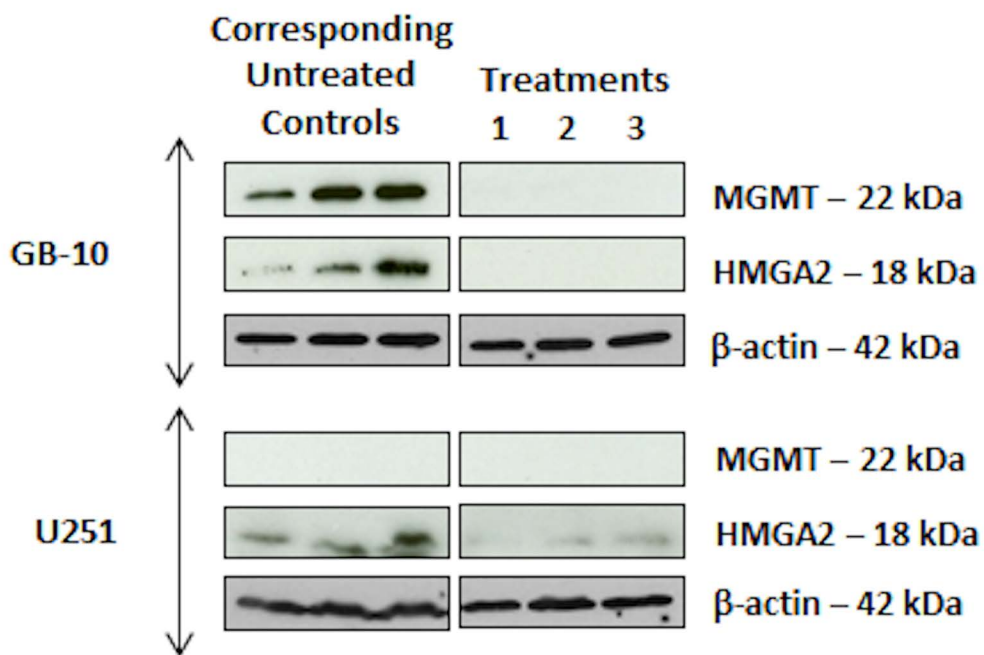

Treatments:

1: 3d Dov

2: 3d Dov + 3d TMZ

3: 3d Dov + 3d TMZ + 1d Dov
